# Supplementary material for: Stable aqueous aluminum-manganese photoelectrochemical cells with high-rate and high-efficiency abilities
Source: Research Square preprint supplement (doi:10.21203/rs.3.rs-714704/v1), 2021-07-22
Supplement: Supplementary file 1 [file 75da902193be0a17fd7290ab.docx]

**Supporting Information**

**Stable aqueous aluminum-manganese photoelectrochemically cells with high-rate and high-efficiency abilities**

Xuefeng Zhang,1 Wei-Li Song,2 Mingyong Wang,1* Jiguo Tu,1 Handong Jiao,2 Shuqiang Jiao1*

1State Key Laboratory of Advanced Metallurgy, University of Science and Technology Beijing, Beijing 100083, P. R. China. E-mail: sjiao@ustb.edu.cn (S. Jiao), mywang@ustb.edu.cn (M. Wang)

2Institute of Advanced Structure Technology, Beijing Institute of Technology, Beijing 100081, P R China. E-mail: weilis@bit.edu.cn (W.-L. Song)

**Supplementary Fig. 1** **The morphological characterization of photoelectrode after cycling.** (A) SEM image. (B) the corresponding DES mappings.

**Supplementary Fig. 2 The phase characterization of** **α-MnO2.** (A) XRD pattern. (B) XPS signal of Mn 2p.

X-ray diffraction (XRD) patterns of as-prepared samples revealed that all the diffraction peaks are well indexed to tetragonal structure of α-MnO2 with the space group 14/m (87) and agreement with JCPDS pattern (#44-141) (Supplementary Fig. 2a). X-ray photoelectron spectroscopy (XPS) was employed to investigate the surface Mn valent state for the pristine α-MnO2. It is found that α-MnO2 was mainly represented as Mn4+ (641.96 eV), in addition to small amount of Mn3+ (641.48 eV) and Mn2+ (640.48 eV).1

**Supplementary Fig. 3 The morphology and element distribution characterization of α-MnO2.** (A,B) SEM images. (C,D) The corresponding EDS mapping of Mn and O element.

Generally, the hydrogen reduction potential is at 4.5 eV below the vacuum level. Therefore, the VBα-MnO2 and CBα-MnO2 edge positions related to the vacuum level can be expressed empirically by the following equation:2

|  | (1) |
| --- | --- |

The calculated edge positions of  and were -3.72 eV (*v**s.* vacuum) and -1.82 eV (*vs.* vacuum), respectively.

**Supplementary Fig. 4 The TEM characterization of α-MnO2.** (A) TEM image. (B) High-resolution TEM image with a SAED pattern.

**Supplementary Fig. 5A,B** The SEM images of photo positive electrode.

**Supplementary Fig. 6** (A) The schematic diagram Zn/Al alloy negative electrode. (B) SEM image of the side of the Zn/Al alloy negative electrode.

**Supplementary Fig. 7 The XRD and XPS characteristic of Zn/Al alloy.** (A) the XRD patterns of original Zn substrate and Zn/Al alloy. (B) The partial enlargement of figure a. (C,D) The XPS signals of Al and Zn in Zn/Al alloy.

Compared to the initial Zn foil, the diffraction peaks of the Zn/Al alloys were shifted to a lower angle in the XRD patterns (Supplementary, Fig. 7A,B). The results reveal the effective alloying of Al with Zn substrate, which was consistent with the previous studies. 3, 4 The XPS spectra suggest that two peaks at 73.3 eV and 74.0 eV were assigned to the metallic Al and Al2O3 on the surface, respectively (Supplementary, Fig. 7C).5, 6 The binding energy of Zn 2p of Zn foil (1021.45 eV) was slightly decreased in comparison with the Zn/Al alloy, which is attributed to the modified electronic structure of Zn in Zn/Al alloy (Supplementary, Fig. 7D).7

**Supplementary Fig. 8** **The SEM and corresponding EDS mapping of Zn/Al alloy negative electrode.** (A) the original Zn foil substrate. (B) the SEM image of the surface of Zn/Al alloy negative electrode. (C,D) The corresponding EDS signals of Zn and Al.

The morphology and element distribution of Zn/Al negative electrode was characterized by SEM and EDS (Supplementary, Fig. 8A,B), showing a certain amount of particles on the Zn substrate to form a homogeneous rough surface. Additionally, the uniform distribution of Zn and Al element signals demonstrated the generation of Zn/Al alloy (Supplementary, Fig. 8C,D).

**Supplementary Fig. 9 The cycling performance and AC impedance of Al-Al,** **TAl-TAl, and Zn/Al-Zn/Al symmetry battery.** (A) The cycling performance. (B) the corresponding AC impedance. (C,D) The V-T curves of 9-15 h of TAl-TAl, and Zn/Al-Zn/Al symmetry battery.

In comparison, the cells using Al and TAl exhibited a higher overpotential, poor stability, and short cycle life, owing to the presence of the alumina layer on the surface of Al foil (Supplementary, Fig. 9C). AC impedance measurements were also performed to investigate the kinetics of the as-assembled symmetric cells (Supplementary, Fig. 9D). The electrochemical impedance spectroscopy (EIS) results also indicated that the fastest charge transfer capability in the Zn/Al-Zn/Al.

**Supplementary Fig. 10 The diffusion control process of photo-actuated battery.** (A) CVs at different scan rate from 1.0-4.0 mV s-1. (B) The relationship between peak current and square root of the scanning rate.

The CVs at different scan rates (1.0 to 4.0 mV s–1) were also performed and each calculated redox peak current was linear with the square root of the scanning rate (Supplementary, Fig. 10A), showing that the peak currents are enhanced with increasing scanning rate. In general, the peak current was composed of two specific parts, such as faradaic current and non-faradaic current. The peak current (*ip* (A)) can be described as a function of the scanning rate (*v*), as below8

|  | (2) |
| --- | --- |

where *a* and *b* are variable constants, and *v* is the scanning rate (V s−1). Typically, the value of *b* approaching 0.5 indicates that the electrochemical reaction is kinetically limited by a diffusion-controlled process. Each calculated redox peak current was linear with the square root of the scanning rate (Supplementary, Fig. 10B), suggesting that the photo-electrochemical battery was mainly linked with the diffusion control reaction.

**Supplementary Fig. 11 The electrochemical evolution of manganese valence during the charging and discharging process.** (A) The Mn 2p of initial α-MnO2.(B-E) Discharged at 1.7, 1.6, 1.4, and 0.5 V, respectively. (F-H) Charged at 1.5, 1.9, and 2.0 V, respectively.

**Supplementary Fig. 12 The charge-discharge curves at different current density under dark condition and illuminated condition.** (A) Dark. (B) illumination.

**Supplementary Fig. 13 GITT analysis.** (A) ion-diffusion coefficient under visible illumination during the charge and discharge process.(B) The GITT curves under dark condition during the charge and discharge process. (C) The voltage profile before, during and after a constant current pulse with schematic labeling of different parameters (D) Ion-diffusion coefficient under dark condition during the charge and discharge process.

The  was determined using the following equation,9

|  | (3) |
| --- | --- |

where *t* presents the relaxation time, *nm* and *Vm* are the molar number and molar volume of the active material, respectively. Also, *S* refers to the surface area of the positive electrode. *∆Es* is the potential variation of constant current charge/discharge, and *∆Et* is potential variation caused by the pulse.

The photo-conversion efficiency could be calculated by following equation:10

|  | (4) |
| --- | --- |

where *η* represents the photo-conversion efficiency, *ES* the areal energy density (2.508 mWh cm-2) at a specific current of 0.1 mA cm-2, *S1* the photo positive electrode area (1.0 cm2), *Pin* the photo-power density (100 mW cm-2), *t* (5.8 h) the charging time under illuminated condition, and *S2* (0.36 cm2) the illuminated surface area.

**Supplementary Fig. 14** **Photocurrent-time curves of as assembled AAIBs at different status under visible light illumination.** (A) Before charging or discharging. (B) Discharged to 0.5 V. (C) Charged to 2.0 V.

**Supplementary Fig. 15 The density functional theory (DFT) calculations of Al3+ intercalation/deintercalation in α-MnO2.** (A) The model structure of α-MnO2 consisting of 18 manganese (purple) and 36 oxygen atoms (red). (B-D) The model structure and electron density map of α-MnO2 intercalated one (Al1(MnO2)18), two (Al2(MnO2)18), and three (Al3(MnO2)18) Al3+, respectively. (E-F) The band structure of (MnO2)18, Al1(MnO2)18, Al2(MnO2)18, and Al3(MnO2)18. (I-L) The corresponding PDOS.

The first-principles calculations were performed within the framework of density functional theory (DFT) in the generalized gradient approximation (GGA) with the Perdew–Burke–Ernzerhof (PBE)11 functional for exchange and correlation effects of the electrons, as implemented in the CASTEP package.12 The crystalline structure of α-MnO2 was modeled by a 1×4×1 supercell consisting of 18 manganese and 36 oxygen atoms. The Monkhorst-Pack scheme13 with a 3×3×3 k-point grid was used to generate the k-points for reciprocal space sampling. The electron wave function was expanded in plane waves up to cut-off energy of 300 eV. The convergence criterion of the self-consistent-field (SCF) tolerance was 1.0×10-5 eV atom-1, the maximum force exerted on each atom was 0.03 eV Å-1, maximum stress was 0.05 GPa, the maximum displacement was 0.001 Å.

**Table 1. The electrochemical performance of the reported aqueous aluminum ion batteries.**

| **Positive electrode Active materials** | **Negative electrode** | **Current density (mA g-1)** | **Discharge capacity (mA h g-1)** | **Discharge voltage (V)** | **electrolyte** | **Testing method** |
| --- | --- | --- | --- | --- | --- | --- |
| α-MnO2 | Zn/Al alloy | 100 | 531 (illuminated) | 1.7 | 2 M Al(OTF)3 | Two electrodes |
| α-MnO2 | Zn/Al alloy | 100 | 376 (dark) | 1.6 | 2 M Al(OTF)3 | Two electrodes |
| AlxMnO2·nH2O14 | Al | 30 | 272 | 1.1 | 5 M Al(OTF)3 | Two electrodes |
| α-MnO215 | TAl | 100 | 168 | 1.3 | 2 M Al(OTF)3 | Two electrodes |
| AlxMnO24 | Zn/Al alloy | 100 | 460 | 1.6 | 2 M Al(OTF)3 | Two electrodes |
| AlxVOPO416 | MoO3 | 1000 | 73 | 0.8 | gelatin-PAM hydrogel electrolyte | Two electrodes |
| MnFe-PBA17 | IL-Al | 200 | 106.3 | 1.2 | gelatin-PAM hydrogel electrolyte | Two electrodes |
| V2O518 | glassy carbon | 40 | 186 | 0.9 | 1 M AlCl3 | Three electrodes (Hg/Hg2SO4 reference electrode) |
| bronze-type VO219 | Graphite paper | 150 | 230.9 | -0.32 | 5 M Al(TOf)3 | Three electrodes (Ag/AgCl reference electrode) |
| K2CoFe(CN)620 | Pt | 100 | 38 | ~ | 1 M Al(NO3)3 | Three electrodes (Ag/AgCl reference electrode) |
| defective rutile TiO2 | Pt | 500 | 143 | 0.8 | 1M AlCl3 / 1M NaCl | Three electrodes (Ag/AgCl reference electrode) |
| PZ21 | Al | 50 | 132 | 0.43 | 5 M Al(TOf)3 | Two electrodes |
| KyMnO222 | pyrolytic graphite | 20 | 67 | 0.5 | 1 M Al(NO3)3 | Two electrodes |
| Bir‐MnO223 | T‐Al | 100 | 320 | 1.35 | 2 M Al(OTF)3 | Two electrodes |
| KCuFe(CN)624 | MoO3 | 200 | 31 | 0.6 | PVA-Al(NO3)3 gel  electrolyte | Two electrodes |
| PEDOT:PSS25 | Active carbon | 200 | 78 | 0.4 | 1.2 M Al2(SO4)3 | Three electrodes (Ag/AgCl reference electrode) |
| MoTaOx26 | Pt | 350 | 337 | -0.53 | 0.5 M Al2(SO4)3 | Three electrodes (Ag/AgCl reference electrode) |

T‐Al, IL-Al and TAl are all abbreviations of modified Al foil by acidic ionic liquid.

**Table 2. A summary of the important parameters and performance of the recently reported photo-actuated batteries.**

| **Positive electrode Active materials** | **Current density (mA g-1)** | **Discharge capacity (mA h g-1)** | **Discharge voltage (V)** | **Enhancement ratio (%)** | **Photo power density (Mw cm-2)** | **Conversion efficiency (%)** |
| --- | --- | --- | --- | --- | --- | --- |
| This work | 100 | 531 | 1.7 | 41.7 | 100 | 1.2 |
| VO227 | 200 | 315 | 0.9 | 11.7 | 12 | 0.18 |
| V2O510 | 50 | 370 | 0.8 | 94.7 | 12 | 1.2 |
| V2O528 | 500 | 127 | 3.3 | 56.7 | 100 | 0.22 |
| LiMn2O429 | C/10 | 62 | 4.1 | 82.3 | 100 | ~ |
| PANINA30 | 2000 | 430 | 1.0 | 18.4 | 300 | ~ |
| LixTiO231 | 47 | 240 | 1.7 | 33.3 | ~ | ~ |
| C6H9C2H4NH3)2PbI432 | 40 | ~90-100 | 2.0 | ~ | 100 | 0.034 |

**References**

1. Tang Q., Jiang L., Liu J., Wang S., Sun G. Effect of surface manganese valence of manganese oxides on the activity of the oxygen reduction reaction in alkaline media. *ACS Catal.* **4**, 457-463 (2014).

2. Wang Y., Zhang R., Li J., Li L., Lin S. First-principles study on transition metal-doped anatase TiO2. *Nanoscale Res. Lett.* **9**, 1-8 (2014).

3. Wang S.-B.*, et al.* Lamella-nanostructured eutectic zinc–aluminum alloys as reversible and dendrite-free anodes for aqueous rechargeable batteries. *Nat. Commun.* **11**, 1-9 (2020).

4. Yan C.*, et al.* Architecting a stable high-energy aqueous al-ion battery. *J. Am. Chem. Soc.* **142**, 15295-15304 (2020).

5. Jalili M., Rostami M., Ramezanzadeh B. An investigation of the electrochemical action of the epoxy zinc-rich coatings containing surface modified aluminum nanoparticle. *Appl. Surf. Sci.* **328**, 95-108 (2015).

6. Feliu Jr. S., Barranco V. XPS study of the surface chemistry of conventional hot-dip galvanised pure Zn, galvanneal and Zn–Al alloy coatings on steel. *Acta Mater.* **51**, 5413-5424 (2003).

7. Lv F.*, et al.* Ir‐based alloy nanoflowers with optimized hydrogen binding energy as bifunctional electrocatalysts for overall water splitting. *Small Methods* **4**, 1900129 (2020).

8. Xiang X., Lu Q., Han M., Chen J. Superior high-rate capability of Na3(VO0.5)2(PO4)2F2 nanoparticles embedded in porous graphene through the pseudocapacitive effect. *Chem. Commun.* **52**, 3653-3656 (2016).

9. Zhang Y., Liu S., Ji Y., Ma J., Yu H. Emerging nonaqueous aluminum‐ion batteries: challenges, status, and perspectives. *Adv. Mater.* **30**, 1706310 (2018).

10. Boruah B. D., Mathieson A, Wen B, Feldmann S, Dose WM, De Volder M. Photo-rechargeable zinc-ion batteries. *Energy Environ. Sci.* **13**, 2414-2421 (2020).

11. Perdew, J. P., Burke K., Ernzerhof M. Generalized gradient approximation made simple. *Phys. Rev. Lett.* **77**, 3865 (1996).

12. Segall, M.*, et al.* First-principles simulation: ideas, illustrations and the CASTEP code. *J. Phys.: Condens Matter.* **14**, 2717 (2002).

13. Monkhorst, H. J., Pack, J. D. Special points for brillouin-zone integrations. *Phys. Rev. B* **13**, 5188 (1976).

14. Wu, C. *et al.* Electrochemically activated spinel manganese oxide for rechargeable aqueous aluminum battery. *Nat. Commun.* **10**, 1-10 (2019).

15. Zhao, Q. Zachman MJ, Al Sadat WI., Zheng J., Kourkoutis LF, Archer L. Solid electrolyte interphases for high-energy aqueous aluminum electrochemical cells. *Sci. Adv.* **4**, eaau8131 (2018).

16. Pwab C. *et al.* A high-performance flexible aqueous Al ion rechargeable battery with long cycle life. *Energy Storage Mater.* **25**, 426-435 (2020).

17. Wang, D. *et al.* A manganese hexacyanoferrate framework with enlarged ion tunnels and two‐species redox reaction for aqueous Al-ion batteries. *Nano Energy* **84**, 105945 (2021).

18. Cai, Y. *et al.* Bronze-type vanadium dioxide holey nanobelts as high performing cathode material for aqueous aluminium-ion batteries. *J. Mater. Chem. A* **8**, 12716-12722 (2020).

19. Ru, Y. Zheng, S. Xue, H. Pang, H. Potassium cobalt hexacyanoferrate nanocubic assemblies for high-performance aqueous aluminum ion batteries. *Chem. Eng. J.* **382**, 122853 (2020).

20. Wu, X. *et al.* Reversible aluminum ion storage mechanism in Ti-deficient rutile titanium dioxide anode for aqueous aluminum-ion batteries. *Energy Storage Mater.* **37**, 619-627 (2021).

21. Chen, J. *et al.* Rechargeable aqueous aluminum organic batteries. *Angew Chem.* **133**, 5858-5863 (2021).

22. Joseph, J. Nerkar J., Tang C., Du A., O'Mullane AP, Ostrikov KK. Reversible intercalation of multivalent Al3+ ions into potassium‐rich cryptomelane nanowires for aqueous rechargeable Al‐ion batteries. *ChemSusChem* **12**, 3753-3760 (2019).

23. He, S. *et al.* A high‐energy aqueous aluminum‐manganese battery. *Adv. Funct. Mater.* **29**, 1905228 (2019).

24. Wang, P. *et al.* A flexible aqueous Al ion rechargeable full battery. *Chem. Eng. J.* **373**, 580-586 (2019).

25. Ai, Y. *et al.* Reversible intercalation of Al‐ions in poly(3, 4‐Ethylenedioxythiophene):Poly(4‐Styrenesulfonate) electrode for aqueous electrochemical capacitors with high energy density. *Energy Technol.* 2001036 (2021).

26. Jin, B. *et al.* A long-term stable aqueous aluminum battery electrode based on one-dimensional molybdenum–tantalum oxide nanotube arrays. *Nanoscale* **13**, 6087-6095 (2021).

27. Volder, M. *et al.* Vanadium Dioxide Cathodes for High‐Rate Photo‐Rechargeable Zinc‐Ion Batteries. *Adv. Energy Mater.* (2021).

28. Boruah, B. D. Wen, B. De Volder, M. Light rechargeable lithium-ion batteries using V2O5 cathodes. *Nano Lett*. (2021).

29. Lee, A. Vrs, M. Dose, WM. Niklas, J. Johnson, C. S. Photo-accelerated fast charging of lithium-ion batteries. *Nat. Commun.* **10**, (2019).

30. Yu, D. S. *et al*. Harvesting air and light energy via "all‐in‐one" polymer cathodes for high‐capacity, self‐chargeable, and multimode‐switching zinc batteries. *Adv. Funct. Mater.* **31**, 2007942 (2021).

31. Nguyen, O. Courtin, E. Sauvage, F. Krins, N. Sanchez, C. Laberty-Robert, C. Shedding light on the light-driven lithium ion de-insertion reaction: towards the design of a photo-rechargeable battery. *J. Mater. Chem. A* **5**, 5927-5933 (2017).

32. Ahmad, S. George, C. Beesley, D. J. Baumberg, J. J. De Volder, M. Photo-rechargeable organo-halide perovskite batteries. *Nano Lett.* **18**, 1856-1862 (2018).
